# Supplementary material for: Radiative Effect and Climate Impacts of Brown Carbon with the Community Atmosphere Model (CAM5)
Source: Copernicus journal article supplement (doi:10.5194/acp-2018-676), 2018-08-07
Supplement: Supplementary file 1 [file acp-2018-676-supplement.pdf]

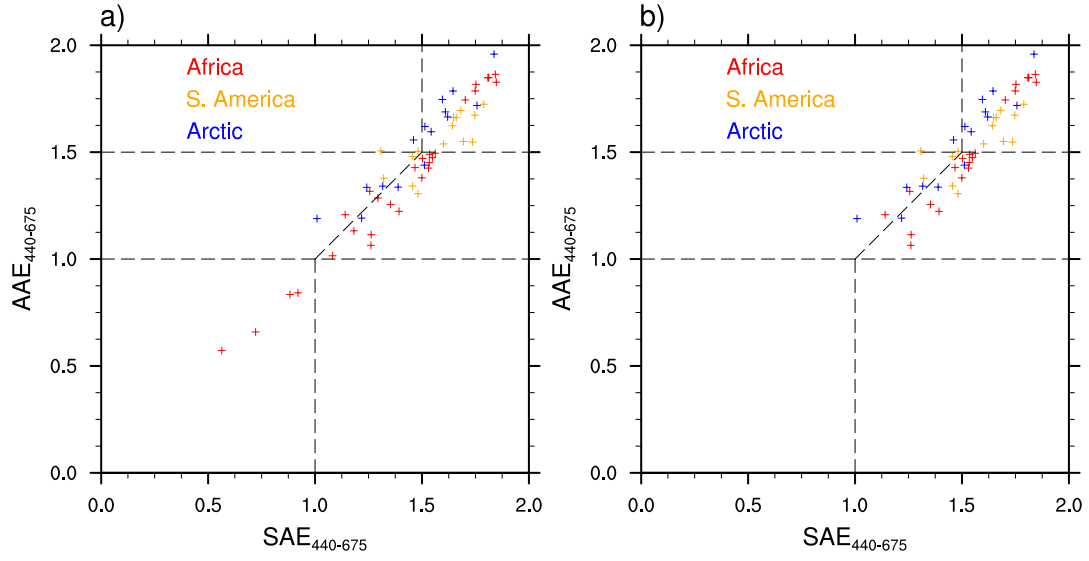

**Figure S1:** AERONET comparison of AAE and SAE (440-675 nm) with the Ascension island site (a) and without (b). The grid box classifications are described in Cappa et al., 2016.

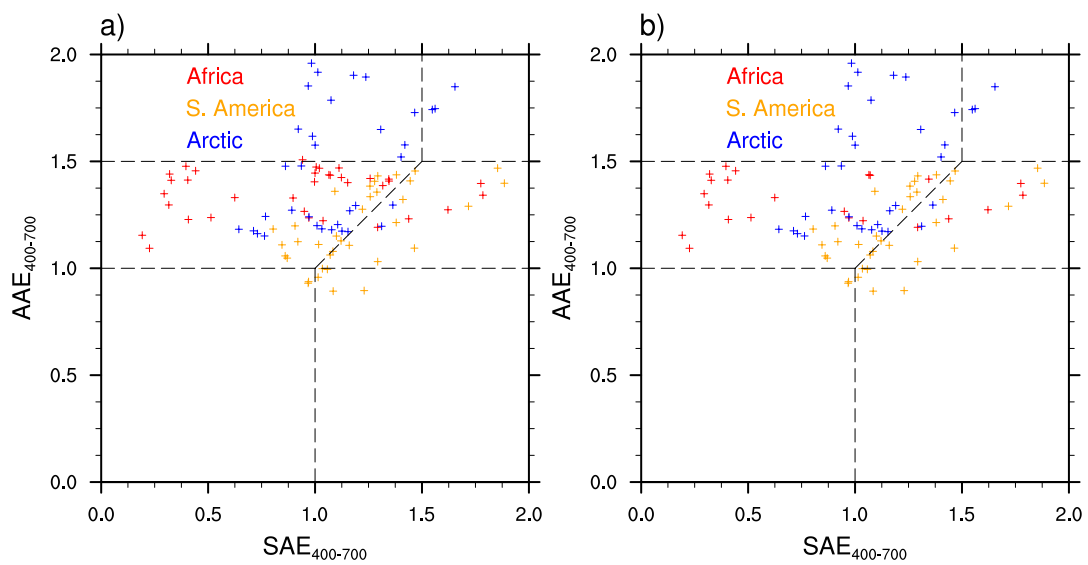

**Figure S2:** Same comparison as Fig S2 but comparing the BRC model run AAE and SAE (400-700 nm).

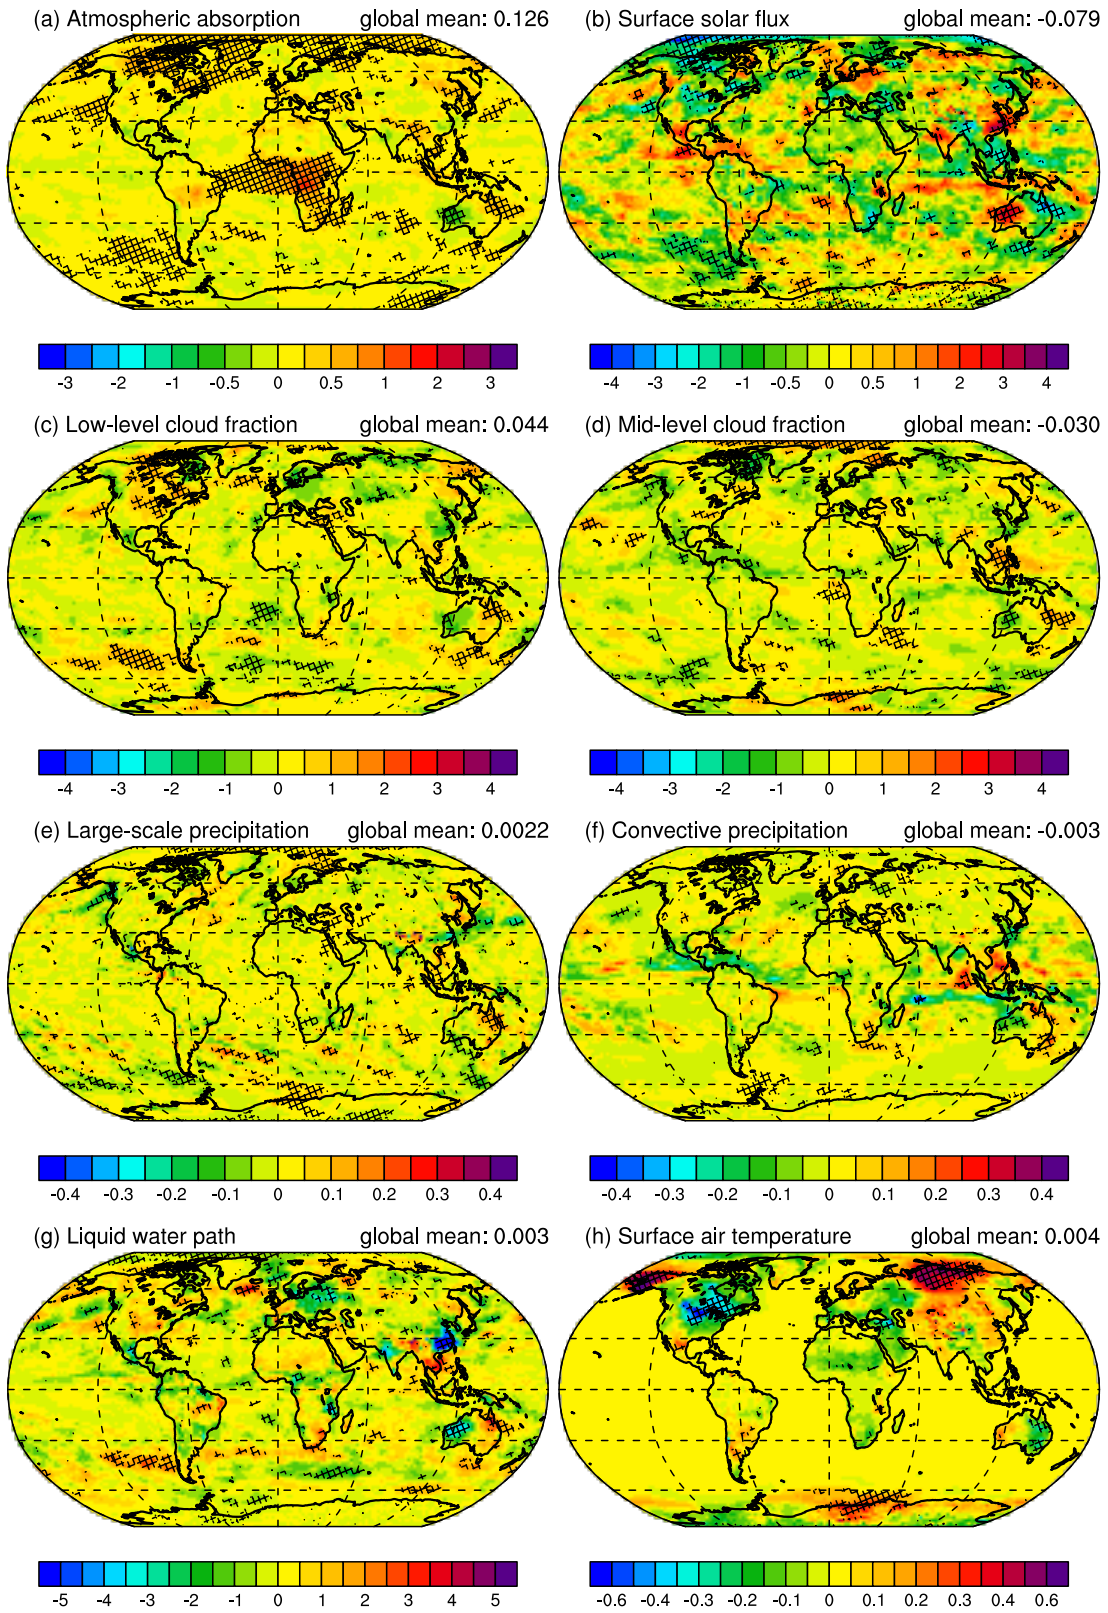

**Figure S3:** The effect of BrC addition with a bleaching parameterization on (a) atmospheric absorption ( $\text{W m}^{-2}$ ), (b) surface solar flux ( $\text{W m}^{-2}$ ), (c) low-level cloud

fraction (%; clouds below 700 mb), (d) Mid-level cloud fraction (%; clouds between 700 and 400 mb), (e) large-scale precipitation ( $\text{mm day}^{-1}$ ), (f) convective precipitation ( $\text{mm day}^{-1}$ ), (g) liquid water path ( $\text{g m}^{-2}$ ), (h) surface air temperature ( $^{\circ}\text{K}$ ). Hatching indicates significance in ensemble year change to the 0.1 level.

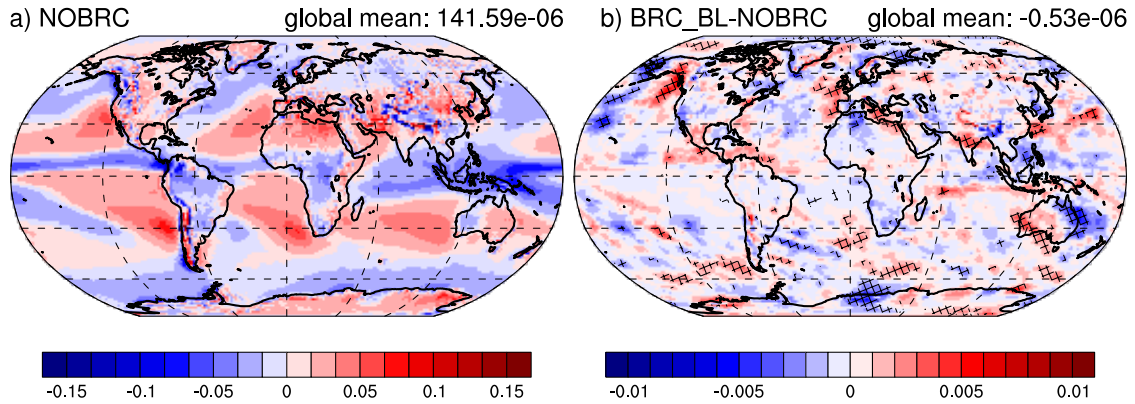

**Figure S4:** 500 mb omega in  $\text{Pa s}^{-1}$ : (a) the default annual average and (b) the difference with the incorporation of BrC and BrC bleaching. Hatching indicates significance in the ensemble year change to the 0.1 level.
